# Structural comparative modeling of multi-domain $\Delta F508$ CFTR

Eli Fritz McDonald<sup>1,2</sup>, Hope Woods<sup>2,3</sup>, Shannon T. Smith<sup>2,3</sup>, Minsoo Kim<sup>3</sup>, Clara T. Schoeder<sup>1,2,7</sup>, Lars Plate<sup>1,4</sup>,  
Jens Meiler<sup>1,2,5,6,7, \*</sup>

<sup>1</sup>Department of Chemistry, Vanderbilt University, Nashville, TN, United States of America

<sup>2</sup>Center for Structural Biology, Vanderbilt University, Nashville, TN, United States of America

<sup>3</sup>Program in Chemical and Physical Biology, Vanderbilt University, Nashville, TN, United States of America

<sup>4</sup>Department of Biological Sciences, Vanderbilt University, Nashville, TN, United States of America

<sup>5</sup>Department of Pharmacology, Vanderbilt University, Nashville, TN, United States of America

<sup>6</sup>Institute for Drug Discovery, Leipzig University, Leipzig, Saxony, Germany

<sup>7</sup>University Leipzig Medical School, Leipzig University, Leipzig, Saxony, Germany

## \*Corresponding author:

Jens Meiler

Email: [jens@meilerlab.org](mailto:jens@meilerlab.org)

Phone: (615)-936-2211

**Keywords:** cystic fibrosis, comparative modeling, computational protein modeling, protein folding disease, pharmacological chaperones, VX-809, structure-based drug discovery

### **Author Summary**

Protein's three-dimension shape determines their function, so when genetic mutation compromises the shape of vital proteins, it may cause disease. Such is the case in Cystic Fibrosis, a chronic genetic disease caused by mutations in the protein Cystic Fibrosis Transmembrane Conductance Regulator. Here, we work backwards from the shape of the wild-type protein – found in healthy people, to computationally model the shape of the most common Cystic Fibrosis mutant. Our computer models reveal distinct defects in the shape of the mutant Cystic Fibrosis Transmembrane Conductance Regulator protein in the area surrounding the mutation. We also model an important FDA approved Cystic Fibrosis drug, VX-809, into the mutant protein structure and show how VX-809 stabilizes the protein around the location of the mutation. The method we developed will pave the way for computational drug design for Cystic Fibrosis.

## **ABSTRACT**

Cystic Fibrosis (CF) is a common genetic disease caused by mutations in the Cystic Fibrosis Transmembrane Conductance Regulator (CFTR), an epithelial anion channel expressed in several vital organs. Absence of functional CFTR results in imbalanced osmotic equilibrium and subsequent mucus build up in the lungs - which increases the risk of infection and eventually causes death. CFTR is an ATP binding cassette (ABC) transporter composed of two transmembrane domains (TMDs), two nucleotide binding domains (NBDs), and an unstructured regulatory domain. The most prevalent patient mutation is the deletion of F508 ( $\Delta$ F508), making  $\Delta$ F508 CFTR the primary target for current FDA approved CF therapies. However, no experimental multi-domain  $\Delta$ F508 CFTR structure has been determined and few studies have modeled  $\Delta$ F508 using multi-domain WT CFTR structures. Here, we used cryo-EM density data and Rosetta comparative modeling (RosettaCM) to compare a  $\Delta$ F508 model with published experimental data on CFTR NBD1 thermodynamics. We then apply this modeling method to generate multi-domain WT and  $\Delta$ F508 CFTR structural models. These models demonstrate the destabilizing effects of  $\Delta$ F508 on NBD1 and the NBD1/TMD interface in both the closed and open conformation of CFTR. Furthermore, we modeled  $\Delta$ F508/R1070W and  $\Delta$ F508 bound to the CFTR corrector VX-809. Our models reveal the stabilizing effects of R1070W and VX-809 on multi-domain models of  $\Delta$ F508 CFTR and pave the way for rational design of additional drugs that target  $\Delta$ F508 CFTR for treatment of CF.

### INTRODUCTION

Cystic Fibrosis (CF) is caused by mutations in the cAMP-regulated, phosphorylation gated anion channel Cystic Fibrosis Transmembrane Conductance Regulator (CFTR) (1). CFTR is an ATP binding cassette type C (ABCC) transporter composed of two nucleotide binding domains (NBDs), two transmembrane domains (TMDs), and a flexible regulatory domain (2). CFTR undergoes a complex domain-domain assembly (**Figure 1A**) during biogenesis and folding. Deletion of phenylalanine 508 in NBD1 ( $\Delta F508$ ) is observed in 70% of patient alleles (3) and thus represents the most common cause of CF and target for drug development.  $\Delta F508$  destabilizes CFTR resulting in premature degradation and gating malfunction (4). Thus, the CF patient phenotype lacks CFTR mediated anion transport at the epithelial apical plasma membrane in the lung epithelia, hindering osmotic regulation and preventing cilia at the tissue/air interface from recycling mucus. Mucus build-up leads to poor lung function, is prone to infection, and ultimately leads to death (5).

At present, CF treatment includes channel gating potentiation and CFTR folding correction through small molecules called potentiators and correctors, respectively (6,7). However, these compounds may interfere with birth control (8), cause testicular pain (9), and results in mental health side effects such as depression and psychotic symptoms (10). Understanding the atomic level mechanisms of CFTR correctors can facilitate computational design of improved CF therapeutics with fewer side effects. Cryo-EM (11) and computational modeling (12) revealed the binding site of FDA approved corrector VX-809 to WT CFTR. However, VX-809 binding to its primary target in the clinic,  $\Delta F508$  CFTR, remains poorly understood.

VX-809 stabilizes  $\Delta F508$  at the NBD1/TMD interface (13,14) and importantly,  $\Delta F508$  requires both NBD1 and NBD1/TMD interface correction to function (15,16). Thus, understanding the structural effects of  $\Delta F508$  on NBD1 and the NBD1/TMD interface with atomic resolution offers a basis for rational, structure-based drug design. Previous studies have used NBD1 crystal structures to simulate  $\Delta F508$  and understand the atomic effects on this single domain (17–19). However, despite the importance of the NBD1/TMD interface for  $\Delta F508$  correction, few studies leveraged recently published multi-domain CFTR structures to model  $\Delta F508$  CFTR (2,20–22). Furthermore, no experimental structures of  $\Delta F508$  CFTR have been determined to date.

9 Here, we used Rosetta to model WT and  $\Delta$ F508 CFTR. We first refined an ensemble of WT CFTR Rosetta  
0 models into the cryo-EM density (23) and then used the lowest scoring refined models as templates for Rosetta  
1 comparative modeling (RosettaCM) (24) to model  $\Delta$ F508. We tested the optimal template number against  
2 thermodynamic data published on CFTR second site suppressor (SSS) NBD1 mutants (15,16,25). Next, multi-  
3 domain WT and  $\Delta$ F508 CFTR structures including TMD1, NBD1, TMD2, and NBD2 were modeled using  
4 RosettaCM. We discussed our results in the context of abundant biochemical information about  $\Delta$ F508 CFTR  
5 folding (26–28). Our models successfully captured  $\Delta$ F508 CFTR thermodynamic destabilization consistent with  
6 folding defects in NBD1 and at the NBD1/TMD interface. Next, we modeled  $\Delta$ F508/R1070W CFTR and  
7 demonstrated its ability to stabilize the NBD1/TMD interface. Finally,  $\Delta$ F508 CFTR bound to VX-809 was  
8 modeled using RosettaCM and showed that drug binding decreased the total energy of the open state, but also  
9 stabilized the local region in the closed state. To our knowledge, this study presents the first attempt to model the  
0 multi-domain  $\Delta$ F508 CFTR protein *in silico* using methods compatible with computer-aided drug design in the  
1 Rosetta Software Suite, a first step towards rational drug design for CF treatment.

## 3 **RESULTS AND DISCUSSION**

### 5 **Refining CFTR models into available Cryo-EM Density Data**

7 To model  $\Delta$ F508, we sought to effectively sample CFTR conformational space *in silico* and generate a  
8 biophysically realistic set of template structures. This is needed as available CFTR structures are well determined  
9 in the TMDs (2.4 Å) but poorly determined in the NBDs (4.8-6Å) resulting in low average resolutions ranging  
0 from 3.2 to 3.9 Å (2,20–22). This motivated us to refine the WT structures into the cryo-EM density maps  
1 according to a previously established approach (23). Refinement generated a diverse set of models that sample  
2 the conformational space inherently accessible in the cryo-EM density map (23). For RosettaCM (29), we chose  
3 a subset of refined models to use as templates.

4 After optimizing refinement parameters for structural diversity (**Supplemental Figure S1**, see Methods), we  
5 refined 2000 models into the cryo-EM density maps (23) for the human dephosphorylated/closed conformation  
6 (PDB ID 5UAK) (2) and the human phosphorylated/open conformation (PDB ID 6MSM) (20). To evaluate the  
7 WT CFTR ensemble diversity, we calculated the C $\alpha$  per-residue root mean squared deviation (RMSD) for each  
8 conformation from the respective published structure. Next, we mapped the average C $\alpha$  per-residue RMSD onto  
9 the respective CFTR model from 0-4 Å to demonstrate visually which regions of CFTR show higher RMSD and  
0 are thus interpreted as inherently more flexible (**Figure 2A, 2B**). The ensemble demonstrated no substantial  
1 change in flexibility after 1000 models had been generated. Thus, we chose to stop generating models after model  
2 2000 assuming a good sampling of the available conformational space.

3 Overall, the poorly determined NBDs showed greater structural diversity than the TMDs, as measured by  
4 RMSD from the published model (**Figure 2A, 2B**). Likewise, in the closed state, NBDs showed greater structural  
5 diversity than the open state (**Figure 2A, 2B**). This likely resulted from the dimerized NBDs in the open state,  
6 which increased stability and lead to higher resolution cryo-EM data. Thus, the closed conformation offered a  
7 greater sampling of conformational space in the refinement ensemble than the open state. The refinement resulted  
8 in an ensemble of CFTR models with diverse conformations of loop regions such as extracellular loops and NBD1  
9 loops.

0 We plotted the C $\alpha$  per-residue RMSD for NBD1 in the open and closed state to compare which sub-domains  
1 and regions demonstrated greater structural diversity between the conformations (**Figure 2C, 2D, Supplemental**  
2 **Figure S2A, S2B**). Notably, the structurally diverse region (SDR), residues 527-547, showed substantial  
3 increased C $\alpha$  RMSD in both conformations, consistent with the known flexibility of the region (**Figure 2C, 2D**)  
4 (30). The loop connecting H7 and  $\beta$ -strand 9 (S9) (residues 595-605) also showed flexibility, consistent with  
5 previous NBD1 only MD simulations indicating that S9 unfolds early in NBD1 unfolding (**Figure 2C, 2D**) (31).  
6 Together, these data suggest our cryo-EM refinement ensemble successfully captured the conformational  
7 flexibility of CFTR consistent with previous computational and experimental studies.

## 9 Testing $\Delta$ F508 Modeling with CFTR NBD1 Second Site Suppressor Mutations

0  
1 We sought to accurately model  $\Delta$ F508 CFTR by leveraging the models generated during cryo-EM  
2 refinement. The low resolution cryo-EM data provided information on the conformational space inherently  
3 accessible to WT CFTR, although it remains unclear if  $\Delta$ F508 CFTR samples the same conformational space.  
4 Given a novel sequence, RosettaCM samples the conformational space of homologous models called *templates*  
5 (24). Instead of a novel sequence and homologous models, we used the  $\Delta$ F508 sequence and WT cryo-EM  
6 refinement models with the lowest potential energy scores as templates (see Methods).

7 We restricted our simulations to NBD1 (residues 385-402 and 435-644) because experimental CFTR  
8 thermodynamic data are only available for NBD1 (15,16,25) (**Supplemental Table 1**). Considering all residues  
9 with determined coordinates from the closed (5UAK) and open (6MSM) state NBD1 (residues 385-402 and 439-  
0 637), these regions superimposed well with an RMSD of 2.23 Å, lower than the published resolution of either  
1 structure (2,20) (**Supplemental Figure S3A**). Thus, we chose to test only the closed state NBD1 as the lower  
2 resolution offers more conformational sampling and the two structures are similar.

3 We generated  $\Delta$ F508 models by threading the  $\Delta$ F508 fasta sequence onto the WT model. The gap can be  
4 closed without major perturbation of the structure of NBD1 (**Figure 3A**). Deletion of F508 prematurely  
5 terminated helix 3 (H3) causing the loop connecting H3 and H4 to shift. This is consistent with the loop shift  
6 observed experimentally in the  $\Delta$ F508 NBD1 crystal structure (32). Likewise, I506 and I507 side chains remained  
7 in their location when compared to WT (**Figure 3A**). Furthermore, G509 was pulled closer to H3 but fails to form  
8 a backbone hydrogen bond with I507. The V510 side chain moved slightly, tightening the loop similar to the  
9  $\Delta$ F508 NBD1 crystal structure (32). We included ATP at the degenerate binding site because NBD1 is known to  
0 fold with ATP as a scaffold at this site (33) (**Figure 3B**). Further, we simulated WT and  $\Delta$ F508 CFTR NBD1  
1 with stabilizing mutations called second site suppressor (SSS) mutations. We included NBD1 SSS mutations  
2 F494N, F494N/Q637R, V510D, I539T, and G550E/R553Q/R555K (**Figure 3B**) because experimental CFTR  
3 thermodynamic data are available for these SSS (15,16,25).

We used NBD1 experimental  $T_m$  and  $\Delta G$  data to test the number of cryo-EM templates needed as input for RosettaCM to successfully capture differences in  $\Delta F508$  thermodynamic instability with and without SSS mutations. Specifically,  $\Delta T_m$  and  $\Delta\Delta G$  with respect to WT NBD1 in each study were used to account for distinct experimental conditions between studies (**Supplemental Table 1**). We generated 1000 models for each mutation and took the average Rosetta score of the lowest scoring 50 models – or lowest scoring 5% of models. Next, the Rosetta score versus the  $\Delta T_m$  and  $\Delta\Delta G$  were plotted for each SSS mutation and we calculated the Pearson correlation coefficient between the Rosetta Scores and the experimental values. Of note, the experimental  $\Delta T_m$  values correlated with the experimental  $\Delta\Delta G$  values with an  $r^2$  of 0.78 which we subsequently assumed represents a good correlation, given the limitations of the experiment data (**Supplemental Figure S3B**).

We determined that using 3, 4, 5, 7, and 9 templates resulted in a Rosetta score- $\Delta T_m$  Pearson correlation coefficient of 0.22, 0.45, 0.71, 0.59, and 0.22 respectively and a Rosetta score- $\Delta\Delta G$  correlation of 0.14, 0.27, 0.54, 0.57, and 0.25 respectively (**Figure 3C, 3D, and Supplemental Figure S3C-G**). Thus, five templates offered the best correlation (**Figure 3C, 3D**).

## **$\Delta F508$ Destabilizes Closed and Open State of human CFTR**

CFTR is unique among ABC transporters to function as a phosphorylation gated anion channel.  $\Delta F508$  CFTR gates inefficiently and requires potentiators such as VX-770 to stabilize the open conformation (34). Given the clinical importance of CFTR channel gating, we modeled  $\Delta F508$  in both the closed and open conformations.

We generated 2000 structure ensembles of WT and  $\Delta F508$  CFTR using RosettaCM for both the closed (PDB ID 5UAK) (2) and open (PDB ID 6MSM) (20) CFTR conformations. We examined the lowest scoring 100 models in terms of Rosetta score (Rosetta Energy Units or REU), which represented the best scoring 5% of the models generated. We plotted structural C $\alpha$  RMSD (relative to the lowest scoring WT model) vs. Rosetta score to determine global structural changes among the mutant models (**Figure 4A, 4B**). WT and  $\Delta F508$  models showed distinct structural shifts as measured by RMSD (**Figure 4A**). Furthermore, the  $\Delta F508$  models showed higher



9 energy in terms of REU (**Figure 4B**). These data suggest our models captured  $\Delta F508$  thermodynamic instability  
0 in both conformations.

1 We sought to determine where  $\Delta F508$  confers thermodynamic instability to the CFTR structure. We used  
2 the residue RMSD from the lowest scoring model in each ensemble as a surrogate for structural flexibility  
3 associated with thermodynamic instability. Hence, we compared the flexibility of the lowest scoring 100 models  
4 in each WT and  $\Delta F508$  ensembles in both conformations (**Supplemental Figure S4**). We subtracted the WT  
5 residue RMSD from the  $\Delta F508$  residue RMSD and mapped the difference onto the published closed and open  
6 conformations (**Figure 4C, 4D**). Here red represents regions where  $\Delta F508$  showed more flexibility than WT, and  
7 blue represents regions where  $\Delta F508$  showed less flexibility. By this metric,  $\Delta F508$  demonstrated higher  
8 flexibility for both conformations in the  $\alpha$ -helical subdomain (residues 500-540), specifically in helix 4B  
9 following F508 (**Figure 4C, 4D and Supplemental Figure S4**). The intercellular loops (ICLs) also demonstrated  
0 higher RMSD in  $\Delta F508$ , particularly ICL4 in the closed state (**Figure 4C, Supplemental Figure S4A**) and ICL2  
1 in the open state (**Figure 4D, Supplemental Figure S4B**). These data suggest our multi-domain  $\Delta F508$   
2 reproduces the known destabilizing effects particularly in NBD1 and the ICLs.

3 Finally, multi-domain CFTR models allowed us to examine the energetic changes at the domain-domain  
4 interfaces. We calculated the residue interaction energy between all residues in the structures. We plotted the  
5 interaction energies between domains for the best scoring 100 models in terms of REU (**Supplemental Figure**  
6 **S5**). Next, WT and  $\Delta F508$  were compared by summing the interaction energy across the interface and plotting  
7 the distribution of sums as boxplots (**Supplemental Figure S6A**).  $\Delta F508$  significantly increases the residue  
8 interaction energy between NBD1 and NBD2 in the open state (**Figure 4E**), consistent with the notion that  $\Delta F508$   
9 drives NBD2 unfolding *in vivo* (27). Furthermore,  $\Delta F508$  significantly increases the interaction energy between  
0 NBD1 and TMD2 (**Figure 4F**), which has long been suggested to be the predominant folding defect of  $\Delta F508$   
1 (15,16). Finally,  $\Delta F508$  significantly increases the interface energy between TMD1/NBD2 and TMD1/TMD2 in  
2 the open state as well (**Supplemental Figure S6B**). These data suggest our models captured the thermodynamic  
3 instability of the NBD1/NBD2 dimer interaction and the NBD1/TMD2 interface expected for the mutant  
4 consistent with destabilizing effects on these interfaces (15,16).

## 5 **Modeling $\Delta$ F508/R1070W in multi-domain CFTR lowers interactions energy at the NBD1/TMD2**

### 6 **interface**

7  
8 Deletion of F508 leaves the aromatic pocket in ICL4 formed by F1068, Y1073, and F1074 empty, but the  
9 CFTR SSS mutation R1070W introduces a tryptophan into this pocket rescuing folding (**Figure 5A**) (15,16).  
0 Interestingly,  $\Delta$ F508/R1070W resisted correction by VX-809 indicating the SSS mutant and drug function via a  
1 similar mechanism stabilizing the NBD1/TMD interface (13). Thus, R1070W represents a clinically relevant SSS  
2 to study in the context of multi-domain CFTR structure. To further evaluate our multi-domain CFTR modeling  
3 approach, we simulated  $\Delta$ F508/R1070W and examined its effect relative to WT and  $\Delta$ F508 CFTR.

4 We generated 2000 structure ensembles of  $\Delta$ F508/R1070W using RosettaCM in both the closed and open  
5 CFTR conformations. We examined the best scoring 100 models (best scoring 5%) in terms of Rosetta Score. We  
6 determined the ensemble structural shift and thermodynamic changes conferred by R1070W by plotting structural  
7 RMSD vs. Rosetta score.  $\Delta$ F508/R1070W shifts the ensemble structure very little from  $\Delta$ F508 models as  
8 measured by RMSD and increases the energy (**Supplemental Figure S7**). These data suggest R1070W may  
9 destabilize the  $\Delta$ F508 structure in our models by increasing the overall score.

0 Since R1070W destabilized  $\Delta$ F508 CFTR on a whole protein level, we sought to determine if R1070W  
1 conferred any local structural changes to the protein. We mapped the difference in residue RMSD of the lowest  
2 scoring 100  $\Delta$ F508/R1070W models vs. the lowest scoring 100  $\Delta$ F508 models onto the published closed and open  
3 conformations (**Figure 5B, 5C**). Here red represents regions unstable in  $\Delta$ F508/R1070W but stable  $\Delta$ F508, and  
4 blue represents regions unstable in  $\Delta$ F508 but stable  $\Delta$ F508/R1070W. By this metric, R1070W stabilized  $\Delta$ F508  
5 more effectively in the open state compared to the closed state (**Figure 5C**). R1070W reduced flexibility in the  
6 NBD1  $\alpha$ -helical subdomain of both conformations (**Supplemental Figure S8A, S8B**). These data indicate our  
7 multi-domain  $\Delta$ F508/R1070W models reduced  $\Delta$ F508 thermodynamic fluctuations, particularly in the open state,  
8 consistent with R1070W stabilizing effects on  $\Delta$ F508 CFTR (15,16).

9 R1070W stabilizes the NBD1/TMD interface *in vitro* (15,16). To study this effect in our models, we  
0 calculated the residue interactions energies for each of the best scoring 100 structures and examined the energetic

1 changes to the domain-domain interfaces. Consistent with experiment, R1070W reduces the NBD1/TMD2  
2 interface energy compared  $\Delta$ F508 alone in the closed and open conformations (**Figure 5D**). Furthermore,  
3 R1070W reduced the TMD1/TMD2 interface energy compared to  $\Delta$ F508 in the open conformation (**Figure 5E**),  
4 showing a reduction towards WT levels of interface energy (**Supplemental Figure S6**). R1070W also reduced  
5 the energy of the TMD1/NBD2 interface (**Supplemental Figure S9**). These data suggest R1070W, despite having  
6 higher total potential energy in terms of Rosetta scores, primary conferred local stability in the TMD interfaces.

7 Our multi-domain models allowed us to simulate SSS mutations that work at NBD1/TMD interface,  
8 known to be important for  $\Delta$ F508 CFTR. We simulated  $\Delta$ F508/R1070W, but R1070W destabilized the structure  
9 in terms of total energy. However, R1070W stabilized the local interactions by lowering the residue RMSD of in  
0 the open state and lowering the residue interaction energy of the NBD1/TMD2 interface.

## 1 **Modeling multi-domain $\Delta$ F508 CFTR bound to VX-809**

2  
3  
4 Current CF drug treatment uses small molecules called correctors to stabilize F508del CFTR including  
5 the FDA approved compound VX-809 (**Figure 6A**). Recently, two studies converged on a putative binding site  
6 for VX-809 to the WT CFTR protein (11,12). We sought to model VX-809 in our  $\Delta$ F508 comparative models to  
7 determine the energetic changes VX-809 confers to  $\Delta$ F508 CFTR.

8 First, we docked VX-809 in Autodock to the open conformation to get an initial binding pose of non-hydrogen  
9 atoms and determine the central coordinates of the molecule. Next, we used these central coordinates to dock a  
0 full atom model into binding pocket of open conformation in Rosetta and observed the lowest scoring 10 models  
1 in terms of interface energy score. We chose a binding pose that closely resembled published cryo-EM binding  
2 site which includes interactions with W361, T360, A198, L195, F81, F78, R74, and N71 (**Figure 6B**) (11). Next,  
3 the full atom docked coordinates were copied into each  $\Delta$ F508 template in the closed and open state for  
4 RosettaCM.

5 We generated 2000 structures of  $\Delta$ F508 CFTR bound to VX-809 and analyzed the best scoring 100 models  
6 in terms of Rosetta Score. VX-809 increased the overall energy in the closed state (**Supplemental Figure S10A**),

7 however, VX-809 reduced the overall energy in the open state (**Supplemental Figure S10B**). To look at local  
8 changes in fluctuations we mapped the difference in Ca RMSD between VX-809 bound and unbound  $\Delta F508$   
9 CFTR onto the closed state model (**Figure 6C, Supplemental Figure S11A**). Here, blue represents areas where  
0 VX-809 reduced flexibility compared to  $\Delta F508$  alone and red represents areas where it increased flexibility.  
1 Notably, VX-809 reduce the RMSD in the binding pocket in the closed state (**Figure 6C**). We also mapped the  
2 RMSD difference onto the open state revealing VX-809 reduced flexibility in NBD1 and ICL2 (**Figure 6D,**  
3 **Supplemental Figure S11B**).

4 VX-809 allosterically stabilizes the NBD1/TMD interface *in vitro* (13,35). We calculated the residue  
5 interaction energy between the domain/domain interfaces in the presence of VX-809. We found that VX-809  
6 increased the energy of the NBD1/NBD2 interface in our model (**Supplemental Figure S12**), however VX-809  
7 reduced the TMD1/NBD2 interface energy in the open state (**Figure 6E**). Furthermore, VX-809 reduced the  
8 TMD1/TMD2 interface energy in both conformations (**Figure 6F**).

9 Thus, including VX-809 in our  $\Delta F508$  CFTR comparative models showed a reduction in overall energy in the  
0 open state. VX-809 also reduced local RMSD in the closed state around the binding site and reduced the energy  
1 in the TMD1/TMD2 interface.

## 3 **CONCLUSION**

4 In conclusion, we used Rosetta to develop multi-domain models of  $\Delta F508$  CFTR, the primary drug target  
5 for CF. There remains a need for methods that can efficiently model large proteins, particularly proteins such as  
6 CFTR which are important drug targets. We combined cryo-EM refinement with RosettaCM to model  $\Delta F508$  and  
7 compare it to WT modeling as a control. Our models captured the thermodynamic instability of  $\Delta F508$ ,  
8 particularly interactions at the NBD1/TMD2 interface. These models provide a basis for computer-based drug  
9 design of CFTR correctors to target and stabilize  $\Delta F508$  CFTR.

0 Previous studies have used computer models to understand  $\Delta F508$  effects on the structure of NBD1. However,  
1 few studies have attempted to understand  $\Delta F508$  effects on multi-domain CFTR, despite the recent publications  
2 of these cryo-EM structures.  $\Delta F508$  folding defects stem from structural defects in both NBD1 and the

3 NBD1/TMD interface, and  $\Delta F508$  correction requires fixing both defects (15,16). Hence, it is imperative to  
4 develop multi-domain models of CFTR to gain insight into the atomic level interactions underlying these  
5 structural defects. Here we used comparative modeling in Rosetta (RosettaCM) as it offers the computational  
6 speed required for virtual drug screening

7 We used recently published cryo-EM models of full length CFTR – with an undetermined R domain – to  
8 refine an ensemble of WT models in the closed and open conformations. The lowest scoring models from  
9 refinement were used as templates for RosettaCM by threading the  $\Delta F508$  sequence onto the structure. We tested  
0 the number of templates required to capture  $\Delta F508$  thermodynamic instability by simulating 1000 models of WT  
1 and  $\Delta F508$  NBD1 with and without SSS mutations with known  $\Delta\Delta G$  and  $\Delta T_M$  values in the literature. Using five  
2 cryo-EM refinement models correlated the best with experimental data. We then applied this sampling method to  
3 multi-domain  $\Delta F508$  CFTR.

4 Here, we developed a RosettaCM approach for modeling  $\Delta F508$  CFTR compatible with RosettaLigand and  
5 the rest of the Rosetta Software Suite we will leverage for future rational CFTR drug design. Our multi-domain  
6 models are still missing many loop regions that remain undetermined in the cryo-EM density. For example, the  
7 regulatory insertion (RI) region changes the thermodynamic stability of CFTR (36) and adopts distinct  
8 conformations, one of which has been postulated to lead to  $\Delta F508$  unfolding (37). Our models are also missing  
9 the R domain (a large unstructured 200 residues between NBD1 and TMD2), the glycosylation site, and the loop  
0 connecting TMD2 to NBD2. Modeling loop regions either with loop modeling in Rosetta or using the cryo-EM  
1 density and Rosetta Enumerated Sampling will further improve the biological relevance of our approach.

2 Our multi-domain  $\Delta F508$  models presents advantages and limitations towards the goal of providing a  
3 basis for computer-based drug design. The closed and open state  $\Delta F508$  models successfully captured the  
4 thermodynamic instability of  $\Delta F508$  CFTR evident by the overall higher Rosetta scores of these models compared  
5 to WT. However, R1070W destabilizes the protein structure in our models, but stabilized the NBD1/TMD2  
6 interface suggesting that our models captured local energetic changes but failed to capture global changes.

7 Corrector compounds stabilize both  $\Delta F508$  NBD1 and the NBD1/TMD interface. Thus, modeling multi-  
8 domain  $\Delta F508$  CFTR represents a key step towards structure-based drug design for CF. We found, among the

9 currently available multi-domain CFTR cryo-EM structures, modeling the open conformation to be consistent  
0 with known experimental  $\Delta F508$  instability. VX-809 stabilized  $\Delta F508$  CFTR in the open state when included in  
1 our model. Thus, the open state and may offer more biologically relevant sampling with this technique than the  
2 closed state. The  $\Delta F508$  CFTR and VX-809 modeling approach developed here will aid future rational, structure-  
3 based drug development efforts for CF.

4

## **METHODS**

### **Protein Structural Data Preparation**

The dephosphorylated (closed) human CFTR cryo-EM structure was downloaded from the PDB (5UAK (2), resolution 3.9 Å, determined residues 5-402, 439-645, 845-883, 909-1172, 1207-1436). The residues from a poorly determined helix between the TMDs were removed from the 5UAK PDB file manually. We also downloaded the phosphorylated (open) human CFTR cryo-EM structure from the PDB (6MSM (20), resolution 3.2 Å, determined residues 1-409, 435-637, 845-889, 900-1173, 1202-1451) and removed lipids and an unresolved helix near the lasso motif manually, ATP was kept in both binding sites. 6MSM contains the stabilizing mutation E1371Q and we used the MutateResidue mover in Rosetta to revert this back to E in our model. Finally, we also downloaded the raw cryo-EM density maps for 5UAK and 6MSM from the PDB.

For our testing set, we prepared a NBD1 structure from 5UAK by truncating the published model at residue Y385 through the determined portion of NBD1 to residue M645 (note this excludes the RI region from 403-438). We modeled ATP into the degenerate site by aligning 5UAK and 6MSM and copying the MG and ATP coordinates from 6MSM into the NBD1 structure. This resulted in an NBD1 structure including ATP bound at the degenerate site for our testing set (**Figure 3B**).

### **Cryo-EM Refinement**

We refined the published coordinates into the raw cryo-EM density maps using a previously established method in Rosetta (23) (see Protocol Capture Step 1). This approach requires the published structure coordinates and the published cryo-EM density map (both available on the PDB) as well as a set of refinement parameters (**Supplemental Figure S1**). We optimized refinement parameters including the weight put on the cryo-EM density, the length of fragment insertion and the distance of fragment insertion to increase ensemble diversity. We evaluated ensemble diversity by calculating the structural alpha carbon ( $C\alpha$ ) root mean squared deviations (RMSD) from the published model for each refinement ensemble and assumed a greater  $C\alpha$  RMSD distribution

0 indicated a more diverse ensemble. We optimized the sampling weight put on the cryo-EM data (denswt), the  
1 root mean squared distance (RMS) for peptide fragment insertion, and the length of the peptide fragments  
2 (**Supplemental Figure S1**).

#### 4 **Optimization of Cryo-EM Refinement Parameters**

5 We optimized the user specified parameters required for Rosetta cryo-EM refinement (23). First, to avoid  
6 overfitting, we optimized the weight put on the experimental density data (denswt) in the refinement score  
7 function. We generated 100 structures at density weight values between 20 and 50 at 5-point intervals. Next, we  
8 plotted these density weight values versus the difference between the Fourier Shell Correlation (FSC) and 4% of  
9 the per-residue energy for the ensemble ( $FSC - 0.04 \times \text{per-residue energy}$ ). The maximum difference indicates the  
0 optimal density weight. We chose a density weight value of 30 as this maximizes the ( $FSC - 0.04 \times \text{per-residue}$   
1  $\text{energy}$ ) value for most structures (**Supplemental Figure S1A, S1B**). Second, to maximize structural diversity,  
2 we optimized the length of peptide fragment insertion. The refinement protocol builds possible models by  
3 breaking sequences of determined residues into peptide fragments of an odd number length (e.g. 5, 7, 9, 11, or  
4 13) (23). Increasing the insertion length increases model diversity (23). We increased the fragment insertion  
5 length from seven to thirteen, generated 100 models for each, and plotted the  $C\alpha$  RMSD of each model in the  
6 refinement from the published model versus the model score for all four CFTR structures. Indeed, increasing the  
7 fragment insertion length from seven to thirteen generated overall lower scoring models with a greater  $C\alpha$  RMSD  
8 distribution for both the closed (PDB ID 5UAK) and open (PDB ID 6MSM) states (**Supplemental Figure S1C,**  
9 **S1D**). Thus, we chose 13 for our fragment length. Third, we optimized the root mean squared (rms) distance  
0 between the inserted peptide fragments by varying this value from 1.5 Å to 2.5 Å in intervals of 0.25 and  
1 generating 100 models per interval. We plotted the  $C\alpha$  RMSD of the most poorly determined domain - NBD1 -  
2 vs. the model score. We plotted NBD1 as this domain will likely have the greatest distribution in structural  
3 diversity from refinement. We chose a rms value of 1.75, as this value increases the NBD1  $C\alpha$  RMSD



4 **(Supplemental Figure S1E, S1F)**. Increasing the rms value beyond 1.75 offered no improvement in NBD1 C $\alpha$   
5 RMSD (data not shown for clarity).

## 7 ***In Silico* Mutagenesis**

8 We made point mutations in CFTR structures using the MutateResidue mover in Rosetta. For the  
9 phosphorylated model, 6MSM, we mutated E1371Q back to the naturally occurring glutamine residue. The low  
0 structural resolution makes side chains difficult to distinguish in regions of NBD1, near F508. Hence to generate  
1 deletion mutations, we removed F508 from the open and closed state CFTR fasta files respectively and threaded  
2 the sequence onto the open and closed state models. For our testing NBD1 structure, we again deleted F508 from  
3 the NBD1 fasta sequence (residue 385-402 and 439-645) and threaded the new sequence onto the NBD1 structure.  
4 We mutated all second site suppressor mutations (F494N, F494N/Q637R, V510D, I539T, and  
5 G550E/R553Q/R555K) in NBD1 constructs prepared for our testing set using the MutateResidue mover in  
6 Rosetta.

## 8 **Rosetta Comparative Modeling**

9 To model CFTR variants, we used RosettCM, a homology modeling approach(24). We perform CM with  
0 static templates derived from the cryo-EM density, not the cryo-EM density itself. Published CFTR structures  
1 contain undetermined loops and intrinsically disordered regions including the RI region, the RD, the glycosylation  
2 site, and the loop linking TMD2 to NBD2. We generated fasta files containing only the determined residues in  
3 5UAK and 6MSM (**Supplemental Table S2**). To generate  $\Delta$ F508 templates, we manually removed F508 from  
4 the fasta files and threaded the  $\Delta$ F sequence onto the five WT models (see *in silico* mutagenesis section). As a  
5 control we used the WT sequence and the original WT templates and performed the same modeling protocol.  
6 Additionally, we mutated R1070W into the  $\Delta$ F508 templates and substituted the W manually to the fasta sequence  
7 to model  $\Delta$ F508/R1070W CFTR.

8 We performed multiple template hybridization with the Hybridize mover in Rosetta guided by the  
9 RosettaMembrane energy function (38,39). We imposed membrane specific Rosetta energy terms within the

0 theoretical membrane bilayer by predicting the transmembrane helix regions with OCTOPUS (40). We set all  
1 template weights to 1.0. For fragment insertion, we used three and nine peptide long fragments with short and  
2 long fragment insertion weights set to 1.0. We optimized side chain positions by simulated annealing, also known  
3 as rotamer packing in Rosetta. We refined final models using one round of FastRelax mover (e.g. repeat =1) in  
4 Rosetta which performs steepest gradient decent minimization in Cartesian coordinate space without constraints.

## 6 **Calculation of Protein Stability Metrics**

7 We evaluated protein thermodynamic stability metrics for WT,  $\Delta F508$ , and  $\Delta F508/R1070W$  CFTR. We  
8 calculated the alpha carbon ( $C\alpha$ ) root mean squared deviation (RMSD) for whole structures as well as on a per-  
9 residue basis with respect to a reference model (either the published model or a low scoring model in the  
0 ensemble). For our per-residue  $C\alpha$  RMSD calculations we first aligned individual domains to account for any  
1 shifts in the domains relative to each other as we were interested only in local fluctuations. We assumed local  $C\alpha$   
2 RMSD as a surrogate for protein flexibility. Furthermore, we calculated the residue interaction potential energy,  
3 which provides the potential energy in REU between every pair of contacting side chain in the structure. Finally,  
4 we calculated Rosetta scores for our NBD1 testing with second site suppressor mutations with ref2015 and  
5 calculated Rosetta scores using the membrane scoring function (38,39).

## 7 **Docking and Parameterizing VX-809**

8 An automated docking tool, Autodock Vina (41) version 1.1.2, Scripps Research Institute (La Jolla,  
9 CA), was employed to dock parameterized VX-809 on the CFTR open cryo-EM structure (PDB-ID: 6MSM).  
0 Top 20 binding modes in the energy range of 100 kcal/mol were computed. Grid parameters: center (x, y, z) =  
1 (165.453, 168.303, 149.074), size (x, y, z) = (20, 20, 20). To get the full atom parameters for VX-809, we  
2 created low energy 3-dimensional ligand conformations in Corina given 2D representation exported from Chem  
3 draw. We then checked the BCL-based basic chemistry for appropriate bond lengths, atom types, etc. Next, we  
4 generated ligand conformers using BCL ConformerGenerator (42) for 8000 iterations and clustered based on

5 distance between individual conformers. We then made Rosetta-readable parameters file for ligand docking and  
6 comparative modeling. This takes the conformer SDF and assigns partial charges and points to the conformer  
7 file. This also outputs centroid and torsional parameter files, which are used in the comparative modeling with  
8 CFTR. We then performed full atom docking in Rosetta using RosettaLigand (43).

## 0 **ACKNOWLEDGEMENTS**

1 We thank members of the Meiler lab for their critical reading and feedback of this manuscript.

## 3 **AUTHOR CONTRIBUTIONS**

4 EFM, HW, LP, and JM conceived the study and planned the simulations. EFM prepared structural models, set up  
5 simulations, and performed simulation. EFM and CTS analyzed the data. EFM prepared the figures and wrote  
6 the manuscript. SS and MK generated VX-809 models, docked models, and performed parameterization. LP, JM,  
7 HW, and MK critically reviewed the manuscript. JM and EFM edited the manuscript.

## 9 **DATA AVAILABILITY**

0 A protocol capture on how to generate CFTR refinement models as well as CFTR comparative models is included  
1 in the Supplemental Information.

## 3 **CONFLICT OF INTEREST**

4 The authors declare that they have no conflict of interest related to this work.

## 5 **REFERENCES**

- 6 1. Cutting GR. Cystic fibrosis genetics: From molecular understanding to clinical application. *Nature*  
7 *Reviews Genetics*. 2015.
- 8 2. Liu F, Zhang Z, Csanády L, Gadsby DC, Chen J. Molecular Structure of the Human CFTR Ion Channel.  
9 *Cell*. 2017;169(1):85–92.
- 0 3. Riordan JR, Rommens JM, Kerem B, Alon N, Grzelczak Z, Zielenski J, et al. Complementary DNA  
1 Linked references are available on JSTOR for this article : Identification of the Cystic Fibrosis Gene :  
2 Cloning and Characterization of Complementary DNA. *Science* (80- ). 1989;245:1066–73.
- 3 4. Welsh MJ, Smith AE. Molecular mechanisms of CFTR chloride channel dysfunction in cystic fibrosis.  
4 *Cell*. 1993.
- 5 5. Koch C, Høiby N. Pathogenesis of cystic fibrosis. *Lancet* [Internet]. 1993;341(8852):1065–9. Available  
6 from: <https://www.sciencedirect.com/science/article/pii/014067369392422P>
- 7 6. Van Goor F, Hadida S, Grootenhuis PDJ, Burton B, Stack JH, Straley KS, et al. Correction of the  
8 F508del-CFTR protein processing defect in vitro by the investigational drug VX-809. *Proc Natl Acad Sci*  
9 [Internet]. 2011;108(46):18843–8. Available from:  
0 <http://www.pnas.org/cgi/doi/10.1073/pnas.1105787108>
- 1 7. Van Goor F. Rescue of CF airway epithelial cell function in vitro by a CFTR potentiator, VX-770. *Proc*  
2 *Natl Acad Sci*. 2009;20(211):16–7.
- 3 8. Jain R, Kazmerski TM, Aitken ML, West N, Wilson A, Bozkanat KM, et al. Challenges Faced by  
4 Women with Cystic Fibrosis. *Clin Chest Med* [Internet]. 2021 Sep 1;42(3):517–30. Available from:  
5 <https://doi.org/10.1016/j.ccm.2021.04.010>
- 6 9. Rotolo SM, Duehlmeyer S, Slack SM, Jacobs HR, Heckman B. Testicular pain following initiation of  
7 elxacaftor/tezacaftor/ivacaftor in males with cystic fibrosis. *J Cyst Fibros*. 2020;
- 8 10. Dagenais RVE, Su VC, Quon BS. Real-World Safety of CFTR Modulators in the Treatment of Cystic  
9 Fibrosis: A Systematic Review. Vol. 10, *Journal of Clinical Medicine* . 2021.
- 0 11. Fiedorczuk K, Chen J. Mechanism of CFTR correction by type I folding correctors. *bioRxiv* [Internet].

1 2021 Jan 1;2021.06.18.449063. Available from:

2 <http://biorxiv.org/content/early/2021/06/18/2021.06.18.449063.abstract>

3 12. Baatallah N, Elbahnsi A, Mornon J-P, Chevalier B, Pranke I, Servel N, et al. CFTR corrector efficacy is  
4 associated with occupancy of distinct binding sites. *bioRxiv* [Internet]. 2021 Jan 1;2021.05.04.442442.

5 Available from: <https://doi.org/10.1101/2021.05.04.442442>

6 13. Okiyoneda T, Veit G, Dekkers JF, Bagdany M, Soya N, Xu H, et al. Mechanism-based corrector  
7 combination restores  $\Delta F508$ -CFTR folding and function. *Nat Chem Biol*. 2013;9(7):444–54.

8 14. Veit G, Velkov T, Lukacs GL. Allosteric folding correction of F508del and rare CFTR mutants by  
9 elexacaftor-tezacaftor-ivacaftor ( Trikafta ) combination Find the latest version : 2020;

0 15. Rabeh WM, Bossard F, Xu H, Okiyoneda T, Bagdany M, Mulvihill CM, et al. Correction of both NBD1  
1 energetics and domain interface is required to restore  $\Delta f508$  CFTR folding and function. *Cell* [Internet].  
2 2012;148(1–2):150–63. Available from: <http://dx.doi.org/10.1016/j.cell.2011.11.024>

3 16. Mendoza JL, Schmidt A, Li Q, Nuvaga E, Barrett T, Bridges RJ, et al. Requirements for efficient  
4 correction of  $\Delta f508$  CFTR revealed by analyses of evolved sequences. *Cell*. 2012;148(1–2):164–74.

5 17. Bahia MS, Khazanov N, Zhou Q, Yang Z, Wang C, Hong JS, et al. Stability Prediction for Mutations in  
6 the Cytosolic Domains of Cystic Fibrosis Transmembrane Conductance Regulator. *J Chem Inf Model*.  
7 2021;

8 18. Estácio SG, Martiniano HFMC, Faísca PFN. Thermal unfolding simulations of NBD1 domain variants  
9 reveal structural motifs associated with the impaired folding of F508del-CFTR. *Mol Biosyst*.  
0 2016;12(9):2834–48.

1 19. Zhenin M, Noy E, Senderowitz H. REMD Simulations Reveal the Dynamic Profile and Mechanism of  
2 Action of Deleterious, Rescuing, and Stabilizing Perturbations to NBD1 from CFTR. *J Chem Inf Model*.  
3 2015;55(11):2349–64.

4 20. Zhang Z, Liu F, Chen J. Molecular structure of the ATP-bound , phosphorylated human CFTR. 2018;1–  
5 6.

6 21. Zhang Z, Chen J. Atomic Structure of the Cystic Fibrosis Transmembrane Conductance Regulator. *Cell*.

2016;167(6):1586-1597.e9.

22. Zhang Z, Liu F, Chen J. Conformational Changes of CFTR upon Phosphorylation and ATP Binding. *Cell* [Internet]. 2017;170(3):483-486.e8. Available from: <http://dx.doi.org/10.1016/j.cell.2017.06.041>
23. Wang RYR, Song Y, Barad BA, Cheng Y, Fraser JS, DiMaio F. Automated structure refinement of macromolecular assemblies from cryo-EM maps using Rosetta. *Elife*. 2016;5(September2016):1–22.
24. Song Y, Dimaio F, Wang RYR, Kim D, Miles C, Brunette T, et al. High-resolution comparative modeling with RosettaCM. *Structure* [Internet]. 2013;21(10):1735–42. Available from: <http://dx.doi.org/10.1016/j.str.2013.08.005>
25. Protasevich I, Yang Z, Wang C, Atwell S, Zhao X, Emtage S, et al. Thermal unfolding studies show the disease causing F508del mutation in CFTR thermodynamically destabilizes nucleotide-binding domain 1. *Protein Sci*. 2010;19(10):1917–31.
26. Farinha CM, Canato S. From the endoplasmic reticulum to the plasma membrane: mechanisms of CFTR folding and trafficking. *Cell Mol Life Sci*. 2017;74(1):39–55.
27. Du K, Sharma M, Lukacs GL. The  $\Delta F508$  cystic fibrosis mutation impairs domain-domain interactions and arrests post-translational folding of CFTR. *Nat Struct Mol Biol*. 2005;12(1):17–25.
28. Hwang T-C, Yeh J-T, Zhang J, Yu Y-C, Yeh H-I, Destefano S. Structural mechanisms of CFTR function and dysfunction. *J Gen Physiol* [Internet]. 2018;150(4):539–70. Available from: <http://www.ncbi.nlm.nih.gov/pubmed/29581173>
29. Bender BJ, Marlow B, Meiler J. Improving homology modeling from low-sequence identity templates in Rosetta: A case study in GPCRs. *PLOS Comput Biol* [Internet]. 2020 Oct 28;16(10):e1007597. Available from: <https://doi.org/10.1371/journal.pcbi.1007597>
30. Aleksandrov AA, Kota P, Cui L, Jensen T, Alekseev AE, Reyes S, et al. Allosteric modulation balances thermodynamic stability and restores function of  $\Delta f508$  CFTR. *J Mol Biol* [Internet]. 2012;419(1–2):41–60. Available from: <http://dx.doi.org/10.1016/j.jmb.2012.03.001>
31. Serohijos AWR, Hegedus T, Riordan JR, Dokholyan N V. Diminished self-chaperoning activity of the  $\Delta F508$  mutant of CFTR results in protein misfolding. *PLoS Comput Biol*. 2008 Feb;4(2).

- 3 32. Lewis HA, Zhao X, Wang C, Sauder JM, Rooney I, Noland BW, et al. Impact of the  $\Delta F508$  mutation in  
4 first nucleotide-binding domain of human cystic fibrosis transmembrane conductance regulator on  
5 domain folding and structure. *J Biol Chem*. 2005;280(2):1346–53.
- 6 33. Khushoo A, Yang Z, Johnson AE, Skach WR. Ligand-Driven Vectorial Folding of Ribosome-Bound  
7 Human CFTR NBD1. *Mol Cell [Internet]*. 2011;41(6):682–92. Available from:  
8 <http://dx.doi.org/10.1016/j.molcel.2011.02.027>
- 9 34. Liu F, Zhang Z, Levit A, Levring J, Touhara KK, Shoichet BK, et al. Structural identification of a  
0 hotspot on CFTR for potentiation. *Science (80- )*. 2019;364(6446):1184–8.
- 1 35. Hudson RP, Dawson JE, Chong PA, Yang Z, Millen L, Thomas PJ, et al. Direct binding of the Corrector  
2 VX-809 to Human CFTR NBD1: Evidence of an Allosteric coupling between the Binding site and the  
3 NBD1:CL4 Interface s. *Mol Pharmacol*. 2017;92(2):124–35.
- 4 36. Aleksandrov AA, Kota P, Aleksandrov LA, He L, Jensen T, Cui L, et al. Regulatory insertion removal  
5 restores maturation, stability and function of  $\Delta F508$  CFTR. *J Mol Biol [Internet]*. 2010;401(2):194–210.  
6 Available from: <http://dx.doi.org/10.1016/j.jmb.2010.06.019>
- 7 37. Scholl D, Sigoillot M, Overtus M, Martinez RC, Martens C, Wang Y, et al. A topological switch in  
8 CFTR modulates channel activity and sensitivity to unfolding. *Nat Chem Biol [Internet]*.  
9 2021;17(9):989–97. Available from: <https://doi.org/10.1038/s41589-021-00844-0>
- 0 38. Yarov-Yarovoy V, Schonbrun J, Baker D. Multipass membrane protein structure prediction using  
1 Rosetta. *Proteins Struct Funct Bioinforma [Internet]*. 2006 Mar 1;62(4):1010–25. Available from:  
2 <https://doi.org/10.1002/prot.20817>
- 3 39. Barth P, Schonbrun J, Baker D. Toward high-resolution prediction and design of transmembrane helical  
4 protein structures. *Proc Natl Acad Sci U S A*. 2007;104(40):15682–7.
- 5 40. Viklund H, Elofsson A. OCTOPUS: Improving topology prediction by two-track ANN-based preference  
6 scores and an extended topological grammar. *Bioinformatics*. 2008;24(15).
- 7 41. Trott O, Olson AJ. AutoDock Vina: Improving the speed and accuracy of docking with a new scoring  
8 function, efficient optimization, and multithreading. *J Comput Chem [Internet]*. 2010 Jan 30;31(2):455–

9 61. Available from: <https://doi.org/10.1002/jcc.21334>

0 42. Mendenhall J, Brown BP, Kothiwale S, Meiler J. BCL::Conf: Improved Open-Source Knowledge-Based  
1 Conformation Sampling Using the Crystallography Open Database. *J Chem Inf Model* [Internet]. 2021  
2 Jan 25;61(1):189–201. Available from: <https://doi.org/10.1021/acs.jcim.0c01140>

3 43. Lemmon G, Meiler J. Rosetta Ligand Docking with Flexible XML Protocols BT - Computational Drug  
4 Discovery and Design. In: Baron R, editor. New York, NY: Springer New York; 2012. p. 143–55.  
5 Available from: [https://doi.org/10.1007/978-1-61779-465-0\\_10](https://doi.org/10.1007/978-1-61779-465-0_10)

6

7



## 8 FIGURES

### 9 FIGURE 1.

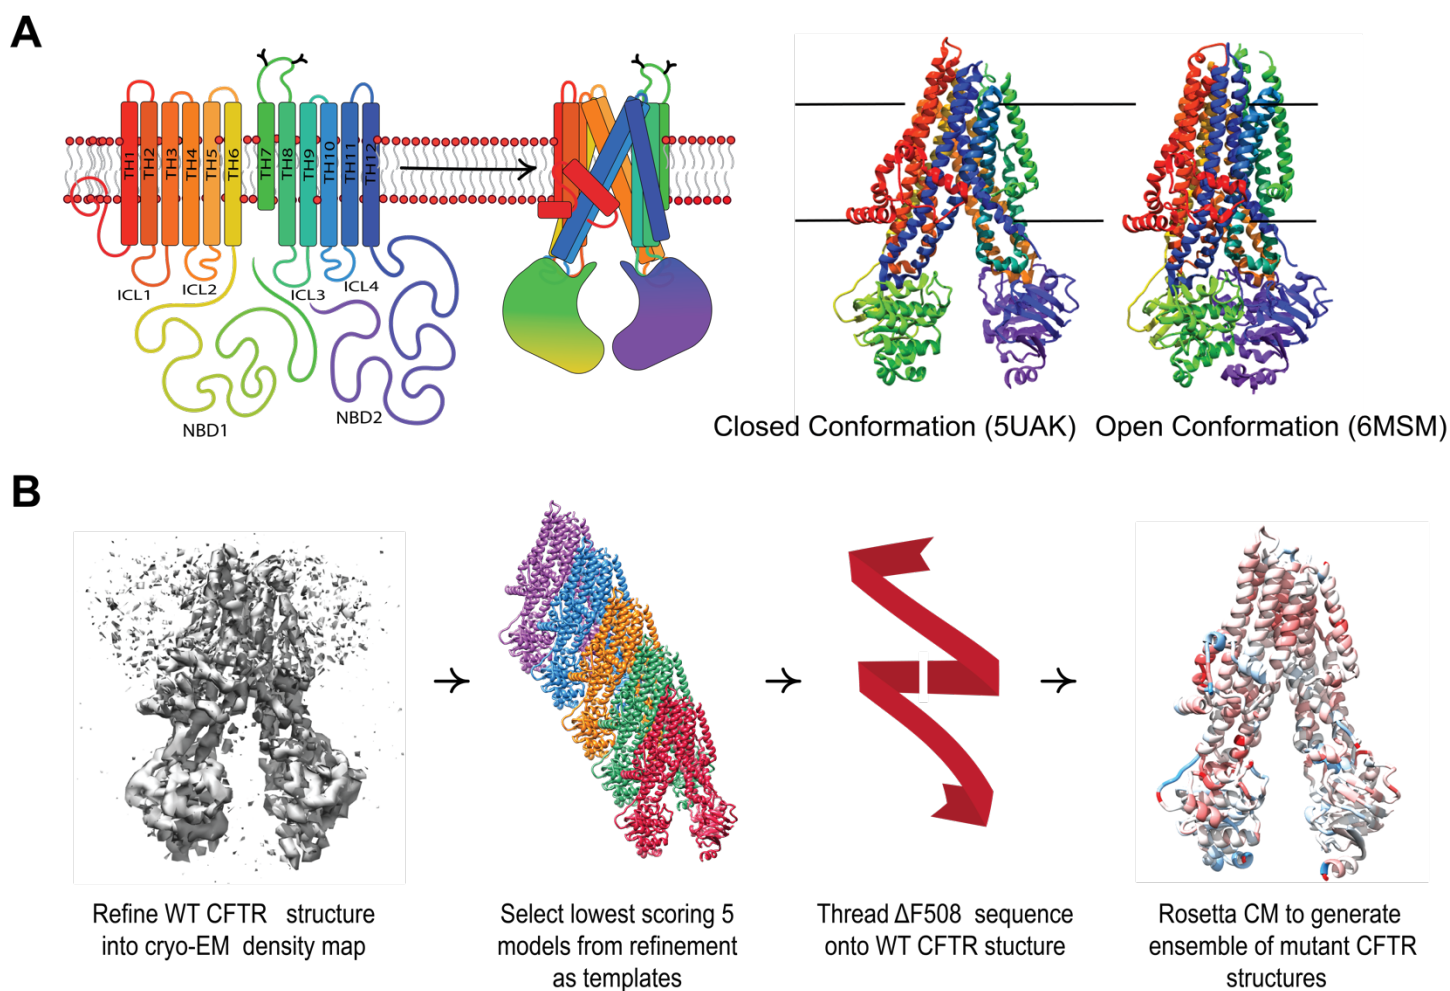

0

1 **Figure 1. Comparative modeling captures multi-domain CFTR thermodynamics.** A. The complex topology  
2 of CFTR involves interdomain contacts formed during the folding process that include intercellular loops (ICLs)  
3 interfacing with the cytosolic NDBs. The closed PDB ID 5UAK(2) (left) and open PDB ID 6MSM(20) (right).

4 **B.** Our workflow for generating ensembles of  $\Delta F508$  models in this study (see Methods).

5

6 FIGURE 2.

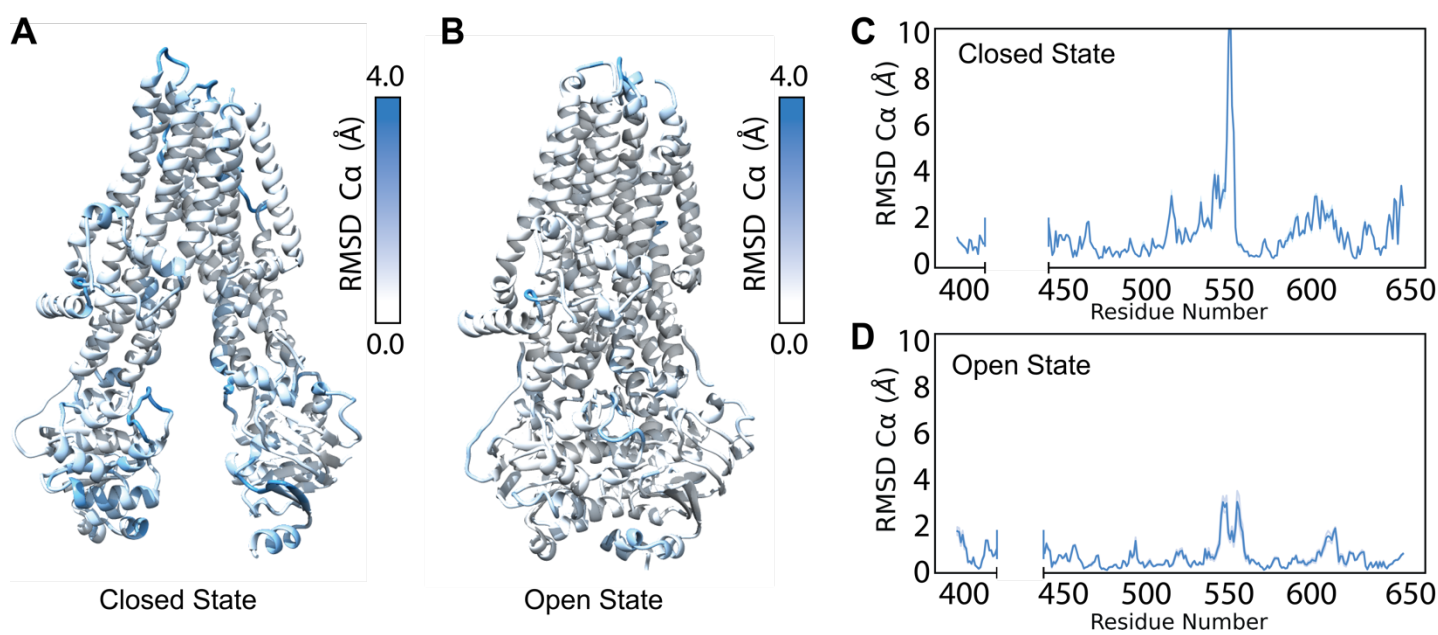

7

8 **Figure 2. Refinement into the cryo-EM density generates a diverse ensemble of structures. A.** Average  
9 RMSD of the best scoring (lowest 10% by potential energy function) 5UAK cryo-EM refinement models mapped  
0 onto 5UAK. **B.** Average RMSD of the best scoring (lowest 10% by potential energy function) 6MSM cryo-EM  
1 refinement models mapped onto 6MSM. **C.** The average NBD1 RMSD of the best scoring 100 5UAK refinement  
2 models. The blue shading represents a 95% confidence interval, and the large RMSD demonstrates high structural  
3 diversity in the SDR (residues 526-547). **D.** The average NBD1 RMSD of the best scoring 100 6MSM refinement  
4 models. The blue shading represents a 95% confidence interval.

5

6

7 FIGURE 3.

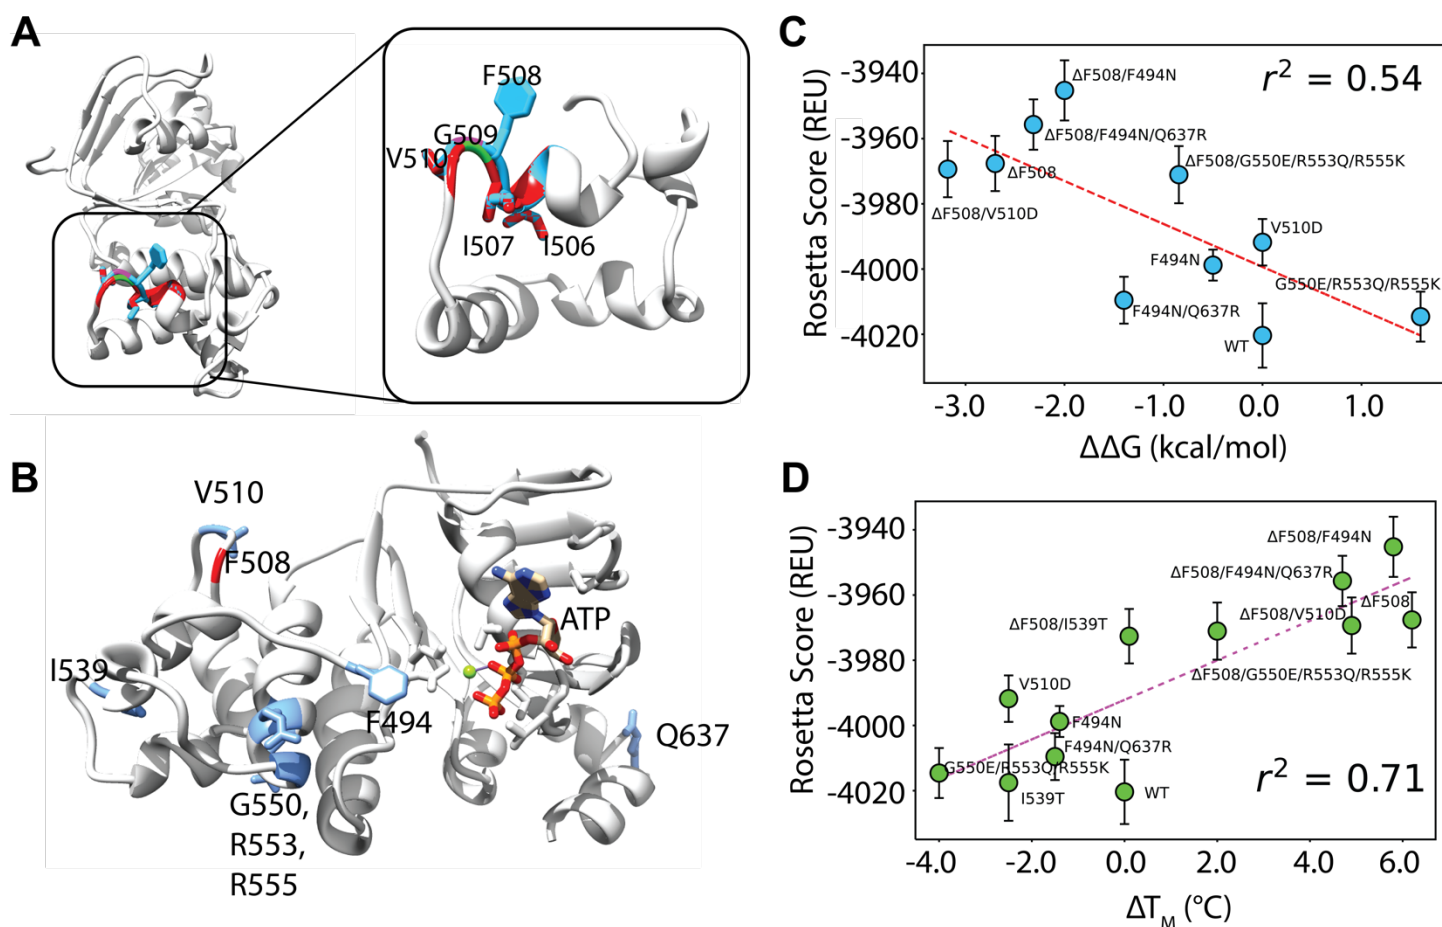

8

9 **Figure 3. Comparative modeling of  $\Delta F508$  NBD1 using five templates correlates well with experimental**

0 **data. A.** An overlay of WT and  $\Delta F508$  CFTR NBD1 structures at the H3/H4 loop. WT is depicted in blue and

1  $\Delta F508$  is depicted in red with just the  $\alpha$ -helical subdomain shown for clarity. Deletion of F508 leaves surrounding

2 residues I506, I507 and V510 relatively unaltered. **B.** The model for testing included NBD1 bound to ATP.

3 Residues mutated in second site suppressor mutations are shown in blue including F494N, V510, I539, G550,

4 R553, R555, and Q637. **C.** Testing correlation between Rosetta score given in REU and  $\Delta\Delta G$  values from the

5 literature (**Supplemental Table S1**). Error bars represent standard error of the mean. Error in experimental data

6 likely ranges with +/- 1-2 kcal/mol. R squared represents Pearson correlation coefficient. **D.** Testing correlation

7 between Rosetta score given in REU and  $\Delta T_M$  values from the literature (**Supplemental Table S2**). Error bars

8 represent standard error of the mean. Error in experimental data likely ranges with +/- 1-2 C. R squared represents

9 Pearson correlation coefficient.

0 FIGURE 4.

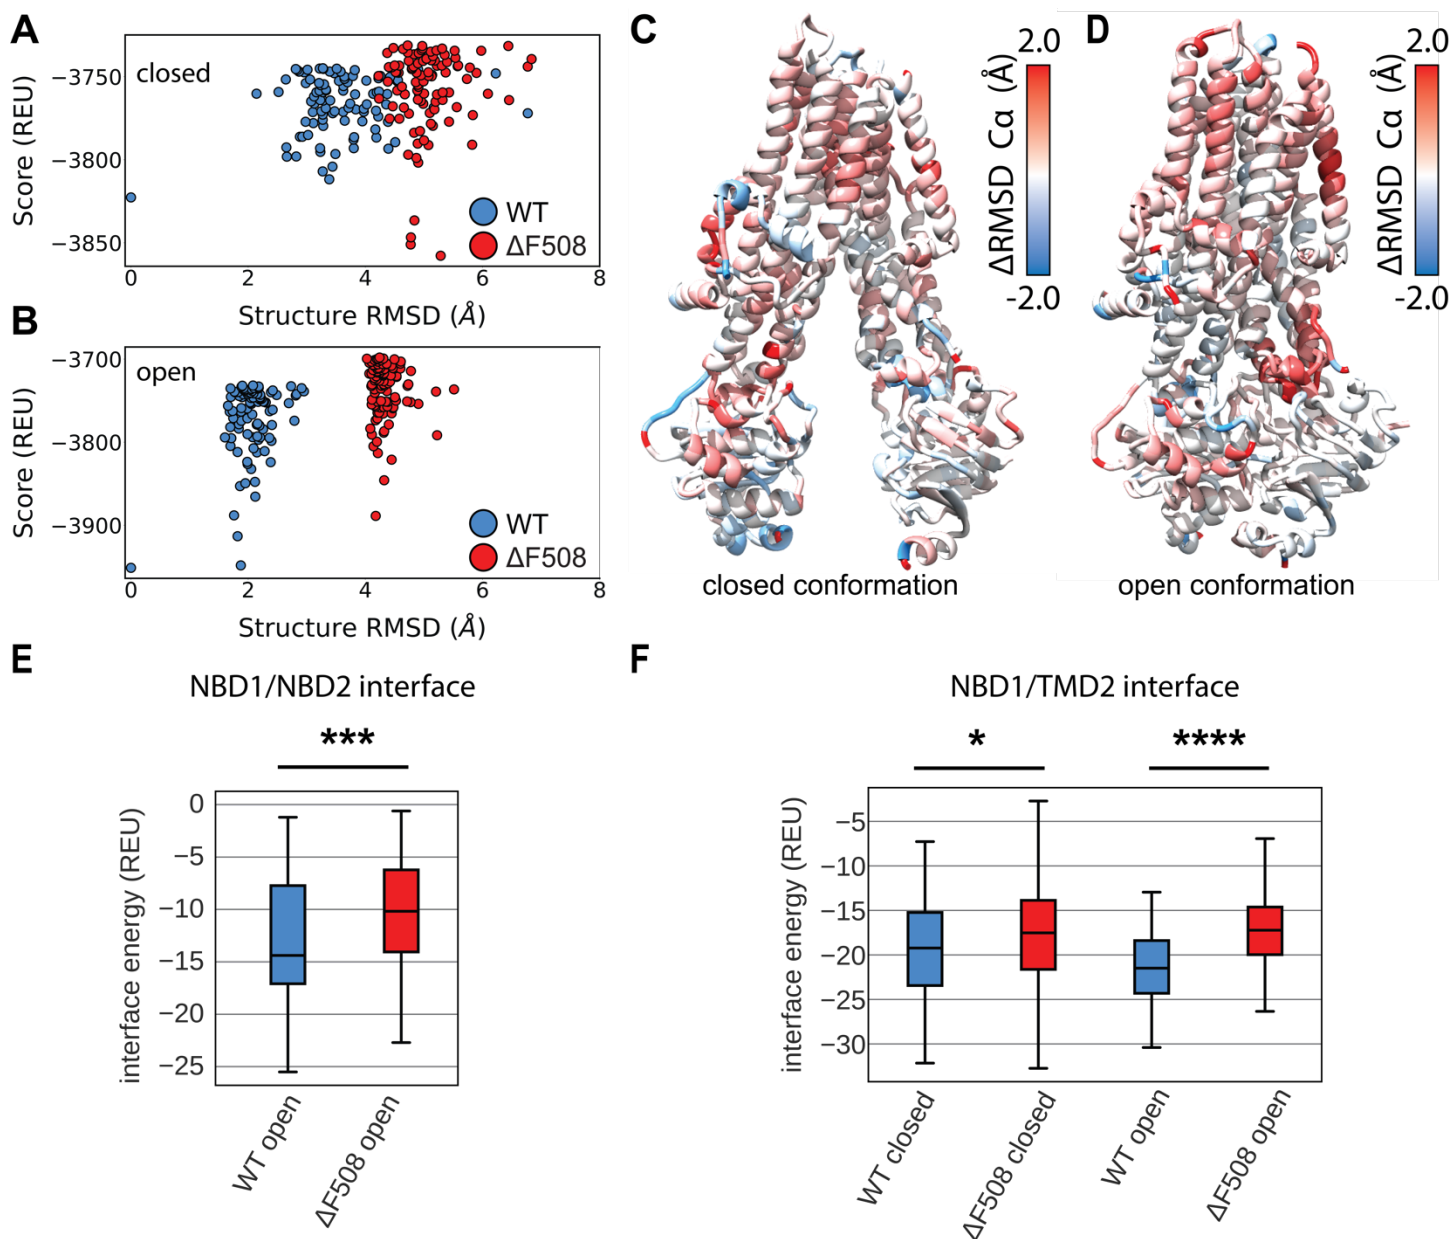

1

2 **Figure 4. Comparative modeling of multi-domain  $\Delta F508$  CFTR shows thermodynamic instability and lose**  
3 **of interaction energy at key domain-domain interfaces. A.**  $C\alpha$  RMSD vs. score plot of the lowest scoring 100  
4 closed conformation models from ensembles of WT (blue) and  $\Delta F508$  (red) CFTR. RMSD is calculated relative  
5 to the lowest scoring WT model. Score is shown in REU. **B.**  $C\alpha$  RMSD vs. score plot of the lowest scoring 100  
6 open conformation models from ensembles of WT (blue) and  $\Delta F508$  (red) CFTR. **C.** Average residue  $C\alpha$  RMSD  
7 of the lowest scoring 100 closed state WT models subtracted from the  $C\alpha$  RMSD of the lowest scoring 100 closed  
8 state  $\Delta F508$  models mapped on 5UAK. Here red represents region where the RMSD was higher in  $\Delta F508$  than

9 WT, and blue represents regions where the RMSD was lower. **D.** Average residue C $\alpha$  RMSD of the lowest scoring  
0 100 closed state WT models subtracted from the C $\alpha$  RMSD of the lowest scoring 100 closed state  $\Delta$ F508 models  
1 mapped on 6MSM. **E.** Quantification of the residue-residue interactions at the NBD1/NBD2 interface across the  
2 lowest scoring 100 models. Only the open state is considered as the closed state lack the NBD dimer and hence  
3 there are no residue interactions to measure. **F.** Quantification of the residue-residue interactions at the  
4 NBD1/TMD2 interface across the lowest scoring 100 models.

5

6 FIGURE 5.

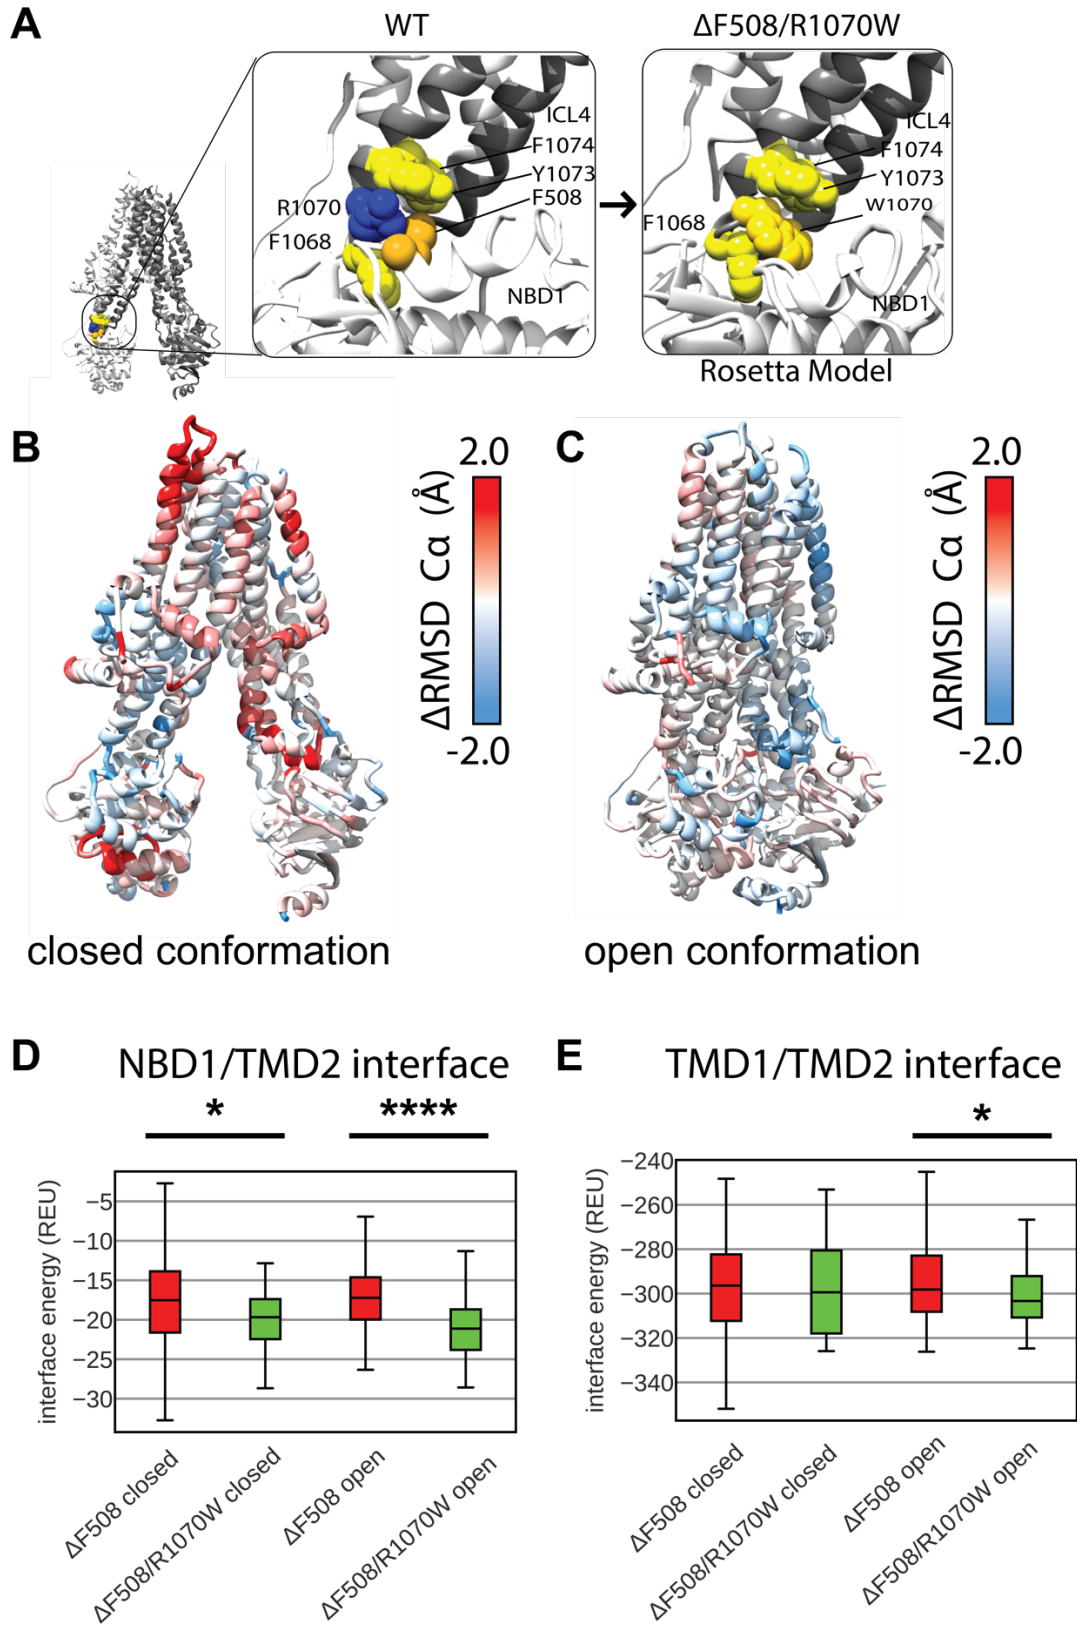

7

8 **Figure 5. R1070W stabilizes the NBD1/TMD2 interface.** A. F508 in 5UAK CFTR (gold spheres) contacts an  
9 aromatic pocket in ICL4 formed by F1068, Y1073, and F1074 (yellow spheres). This aromatic pocket is filled

0 with R1070 (blue) is mutated to a tryptophan (left). **B.** Average residue  $C\alpha$  RMSD of the lowest scoring 100  
1 closed state  $\Delta F508$  /R1070W models subtracted from the  $C\alpha$  RMSD of the lowest scoring 100 closed state  $\Delta F508$   
2 models mapped on 5UAK. Here red represents region where the RMSD was higher in  $\Delta F508$ /R1070W than  
3  $\Delta F508$  alone, and blue represents regions where the RMSD was lower and hence stabilized by R1070W. **C.**  
4 Average residue  $C\alpha$  RMSD of the lowest scoring 100 closed state  $\Delta F508$  /R1070W models subtracted from the  
5  $C\alpha$  RMSD of the lowest scoring 100 closed state  $\Delta F508$  models mapped on 6MSM. **D.** Quantification of the  
6 residue-residue interactions at the NBD1/TMD2 interface across the lowest scoring 100 models. **E.** Quantification  
7 of the residue-residue interactions at the TMD1/TMD2 interface across the lowest scoring 100 models. R1070W  
8 likely stabilize TMD2 enough to reduce the interaction energy between the TMDs in the open conformation.  
9

0 FIGURE 6.

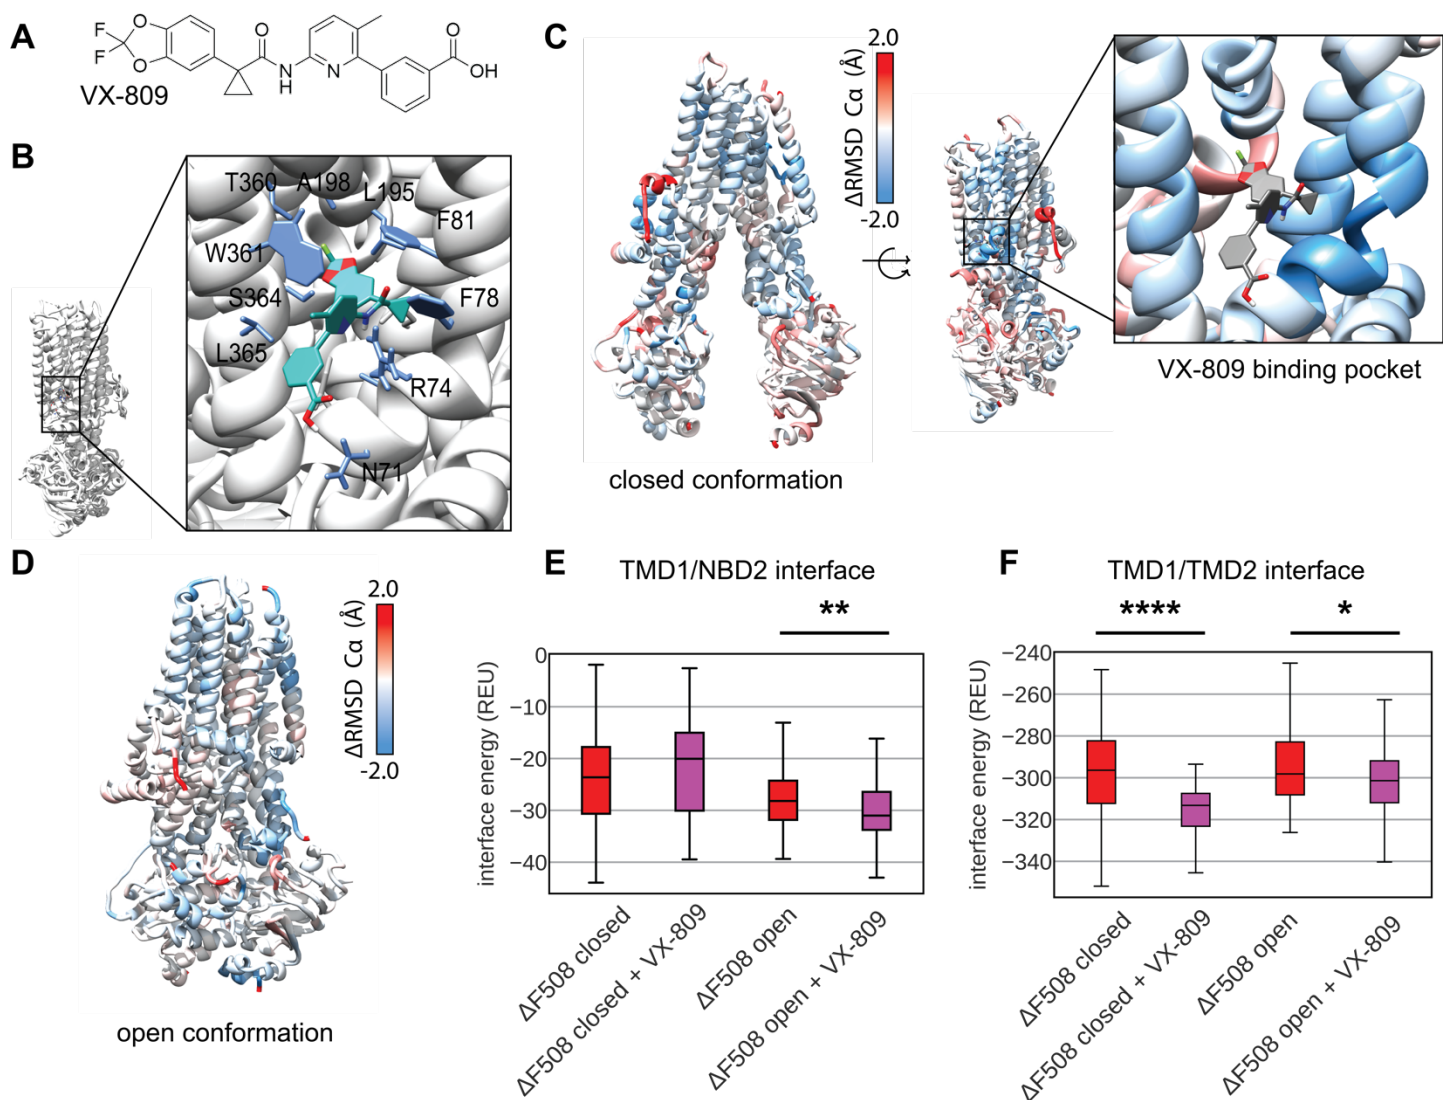

1

2 **Figure 6. Comparative modeling of VX-809 bound to TMD1 ΔF508 reveals local stability changes including**

3 **the TMD1 domain-domain interfaces.** **A.** VX-809 docked to 6MSM CFTR structure in a putative binding site

4 recently published by two parallel studies.(11,12) Interactions with important residues are shown in blue, VX-

5 809 is shown in green with colored hetero-atoms. **B.** Average residue Cα RMSD of the lowest scoring 100 closed

6 state ΔF508+VX-809 models subtracted from the Cα RMSD of the lowest scoring 100 closed state ΔF508 models

7 mapped on 5UAK. Here red represents region where the RMSD was higher in ΔF508 +VX-809 than ΔF508 alone,

8 and blue represents regions where the RMSD was lower hence the structure was stabilized by VX-809. The inset

9 shows the RMSD of the region surrounding VX-809 demonstrates reduced RMSD. **C.** Average residue Cα RMSD

0 of the lowest scoring 100 closed state ΔF508+VX-809 models subtracted from the Cα RMSD of the lowest



1 scoring 100 closed state  $\Delta F508$  models mapped on 6MSM. **D.** Quantification of the residue-residue interactions  
2 at the TMD1/NBD2 interface across the lowest scoring 100 models. **E.** Quantification of the residue-residue  
3 interactions at the TMD1/TMD2 interface across the lowest scoring 100 models.

4
